# Supplementary material for: Mesophase behavior of new linear supramolecular hydrogen-bonding complexes
Source: Royal Society of Chemistry journal article supplement (doi:10.1039/c8ra07692h), 2018-01-01
Supplement: c8ra07692h1.pdf [file c8ra07692h1.pdf]

## Supplementary data

### Mesophase behavior of new linear supramolecular hydrogen-bonding complexes

H. A. Ahmed\*<sup>a,b</sup>, M. Hagar<sup>a,c</sup>, and A. Aljuhani<sup>d</sup>

- College of Sciences, Chemistry Department, Yanbu, Taibah University, Saudi Arabia.
- Faculty of Science, Department of Chemistry, Cairo University, Cairo, Egypt.
- Faculty of Science, Chemistry Department, Alexandria University, Alexandria, Egypt.
- Faculty of Sciences, Chemistry Department, Al-Madina Al-Mounawwara, Taibah University, Saudi Arabia.

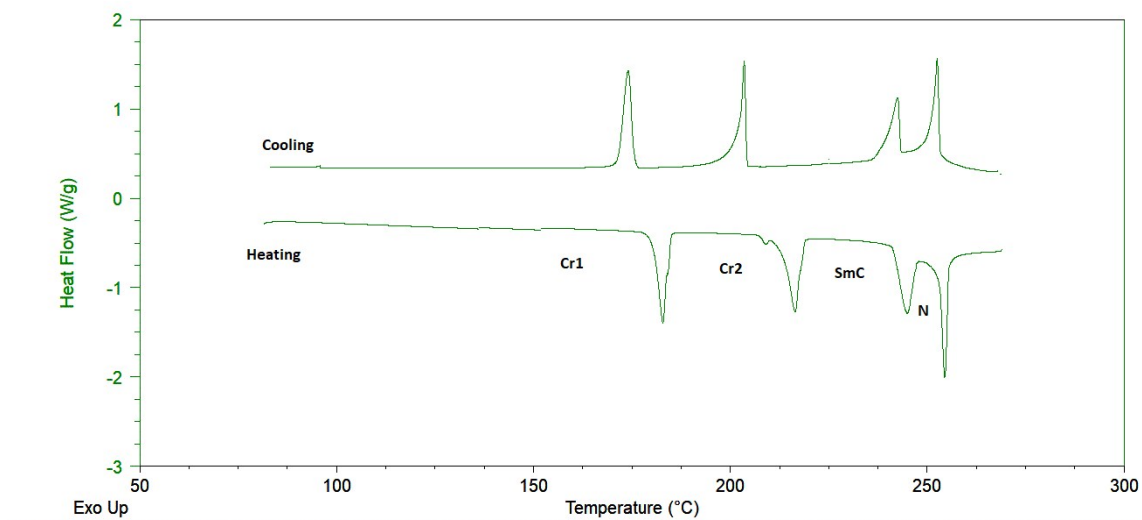

**Figure 1:** DSC curve of **I10** at heating rate 10 °C/min for heating and cooling cycles.

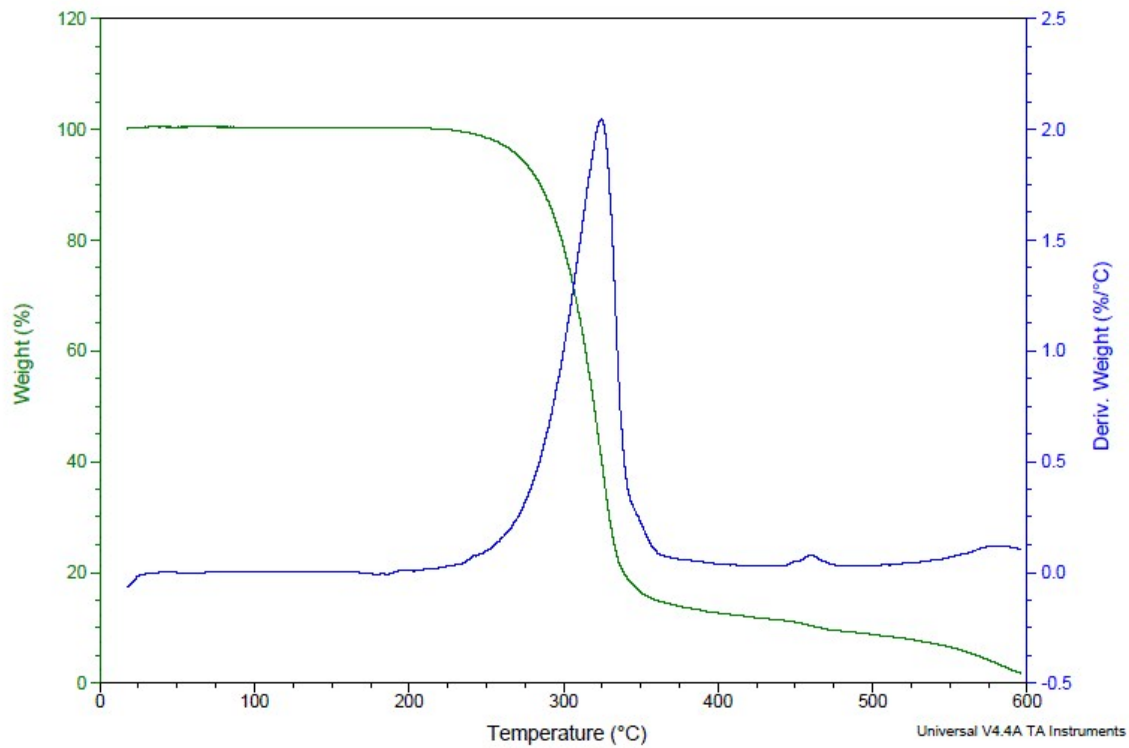

**Figure 2:** Thermogravimetric analysis (TGA) thermogram of **110**
